# Supplementary material
Source: PubMed Central journal article supplement (PMC7597030)
Supplement: NIHMS1062782-supplement-Sup_2.pdf [file NIHMS1062782-supplement-Sup_2.pdf]

**Supplementary Material 2: Surgery and histopathology details of Fukuoka negative and Fukuoka positive cysts**

**Surgery in FN cysts**

On follow-up, 19 patients with FN cyst on initial imaging study underwent surgery for PCL. Before undergoing surgery, 6 patients had FP features and 13 did not. Indication for surgery in the latter 13 patients were an enlarging cyst or patient preference for 7, positive family history with first-degree relative with PC for 3, solid mass adjacent to cyst for 2, and ampullary dysplasia for 1 patient. Histopathologic evaluation showed 8 IPMNs: 6 BD-IPMN (BD-IPMN with low-grade dysplasia [n=5] and BD-IPMN with invasive cancer [n=1]) and 2 mixed IPMNs. The other 5 patients had 1 MCN, 3 SCNs, and 1 CPNT.

**Surgery in FP cysts**

On follow-up, 91 patients underwent cyst surgery, of which 6 cysts were initially FN but developed FP features on follow-up before undergoing cyst surgery. Final histopathologic results of the cysts are described in Table below.

**Table.** Histopathologic Subtypes of Presumed Fukuoka-Positive IPMNs Undergoing Surgery

| <b>Histopathologic Subtype</b> | <b>Patient No.</b> |
|--------------------------------|--------------------|
| Branched duct-IPMN             | 39                 |

|                                                           |    |
|-----------------------------------------------------------|----|
| Low-grade dysplasia                                       | 31 |
| High-grade dysplasia                                      | 2  |
| Invasive cancer                                           | 6  |
| Main duct-IPMN                                            | 3  |
| Low-grade dysplasia                                       | 3  |
| Mixed-IPMN                                                | 20 |
| Low-grade dysplasia                                       | 13 |
| High-grade dysplasia                                      | 2  |
| Invasive cancer                                           | 5  |
| Serous cystic neoplasm                                    | 6  |
| Pancreatic cancer                                         | 5  |
| Pseudocyst                                                | 4  |
| Mucinous cystic neoplasm                                  | 3  |
| Solid pseudopapillary neoplasm                            | 2  |
| Cystic pancreatic endocrine neoplasm                      | 2  |
| Pancreatic ductal adenocarcinoma with cystic degeneration | 1  |
| Pancreatic neuroendocrine tumour                          | 1  |
| Lymphangioma                                              | 1  |
| Chronic pancreatitis                                      | 1  |
| Splenic epithelial cyst                                   | 1  |
| Lymphoepithelial cyst                                     | 1  |
| Gastrointestinal stromal tumor                            | 1  |

|       |    |
|-------|----|
| Total | 91 |
|-------|----|

Abbreviation: IPMN, intraductal papillary mucinous neoplasm.
