# Supplementary material
Source: PubMed Central journal article supplement (PMC7597030)
Supplement: NIHMS1062782-supplement-Sup_3.pdf [file NIHMS1062782-supplement-Sup_3.pdf]

**Supplementary Material 3: Pancreatic cancer details in Fukuoka negative and Fukuoka positive cysts**

PC in FN cysts

On 5-year follow-up, 5 patients had PC; 3 patients (60%) had PC at the site of IPMN, 1 (20%) had PC away from site of cyst, and for 1 (20%), it was unclear whether PC had developed from cyst because the patient did not undergo surgery and imaging showed a solid mass adjacent to the cyst. Of 3 patients who had PC at the site of IPMN, 2 had HR FP features (solid component with pancreatic and bile duct dilation in 1 patient and only solid component in the other patient) before receiving a diagnosis of cancer. The third patient, who did not have FP features, had a solid mass adjacent to the cyst seen on EUS. After surgery, clinicians discovered that the cancer arose from the cyst. Table below describes details of the PC on the basis of the American Joint Committee on Cancer staging system.

Pancreatic Cancers Arising From Fukuoka-Negative Cysts, Based on American Joint Committee on Cancer Staging System

| <b>Stage</b> | <b>T</b> | <b>N</b> | <b>M</b> | <b>Site of Malignancy</b> | <b>Underwent Surgery</b> | <b>Outcome</b>                  |
|--------------|----------|----------|----------|---------------------------|--------------------------|---------------------------------|
| IB           | 2        | 0        | 0        | Site of cyst              | Yes                      | Died 5 y later, ?aetiology      |
| IIA          | 3        | 0        | 0        | Site of cyst              | Yes                      | Alive after 7 y                 |
| IIB          | 3        | 1        | 0        | Site of cyst              | Yes                      | Died 2 y later of metastatic PC |
| IIB          | 3        | 1        | 0        | Site of cyst              | No                       | Died within 4 mo of diagnosis   |

|     |   |   |   |                |     |                                 |
|-----|---|---|---|----------------|-----|---------------------------------|
| IIB | 3 | 1 | 0 | Away from cyst | Yes | Died 3 y later of PC recurrence |
|-----|---|---|---|----------------|-----|---------------------------------|

### PC in FP cysts

Twenty-six cases of PC were identified: 22 (84.6%) with cancer at site of cyst; 3 (11.5%) with cancer away from cyst; and 1 with a preoperative diagnosis of MD-IPMN based on computed tomography and EUS. Surgical specimen showed adenocarcinoma of the head of pancreas with duct dilation throughout the gland. Table below describes details of the PC based on the American Joint Committee on Cancer staging system.

### Pancreatic Cancers Arising From Fukuoka-Positive Cysts, Based on American Joint Committee on Cancer Staging System

| Stage | T | N | M | Site of Malignancy | Underwent Surgery | Outcome                                                   |
|-------|---|---|---|--------------------|-------------------|-----------------------------------------------------------|
| IA    | 1 | 0 | 0 | Away from cyst     | Yes               | Died after 1.5 y of <u>metastatic ca</u>                  |
| IA    | 1 | 0 | 0 | Site of cyst       | Yes               | Recurrence after <u>6 mo</u> ,<br><u>died after 2.5 y</u> |
| IA    | 1 | 0 | 0 | Site of cyst       | No                | Unknown; no follow-up                                     |
| IA    | 1 | 0 | 0 | Site of cyst       | No                | Died after 6 mo                                           |
| IA    | 1 | 0 | 0 | Site of cyst       | Yes               | Alive <u>6 y</u> from diagnosis                           |
| IA    | 1 | 0 | 0 | Site of cyst       | Yes               | Died after 5 y, unclear cause                             |
| IA    | 1 | 0 | 0 | Site of cyst       | Yes               | Died after 1 mo secondary to                              |

|     |   |   |   |                |     |                                                 |
|-----|---|---|---|----------------|-----|-------------------------------------------------|
|     |   |   |   |                |     | complications from Whipple surgery              |
| IB  | 2 | 0 | 0 | Site of cyst   | Yes | Alive 10 y <u>from diagnosis</u>                |
| IB  | 2 | 0 | 0 | Site of cyst   | Yes | Died after 4 y, of metastatic pancreatic cancer |
| IB  | 2 | 0 | 0 | Site of cyst   | Yes | Died after 11 mo                                |
| IB  | 2 | 0 | 0 | Site of cyst   | Yes | Alive 4 y <u>from diagnosis</u>                 |
| IIA | 3 | 0 | 0 | Away from cyst | No  | Died after 6 mo                                 |
| IIB | 3 | 1 | 0 | Site of cyst   | Yes | Alive; follow-up available for 5 mo             |
| IIB | 3 | 1 | 0 | Site of cyst   | Yes | Died after 4 y, of metastatic pancreatic cancer |
| IIB | 2 | 1 | 0 | Site of cyst   | Yes | Died after 2 y, of metastatic pancreatic cancer |
| IIB | 2 | 1 | 0 | No cyst        | Yes | Died 7 mo after surgery                         |
| IIB | 3 | 1 | 0 | Away from cyst | Yes | Died after 9 mo                                 |
| IIB | 3 | 0 | 0 | Site of cyst   | Yes | Died after 2 y, ?reasons                        |
| III | 4 | 0 | 0 | Site of cyst   | Yes | Died after 2.5 y                                |
| III | 4 | 0 | 0 | Site of cyst   | No  | Died after 6 mo                                 |
| IV  | 1 | 0 | 1 | Site of cyst   | No  | Died after 6 mo                                 |
| IV  | 4 | 0 | 0 | Site of cyst   | No  | Died after 1.5 y                                |
| IV  | 4 | 0 | 1 | Site of cyst   | No  | Died after 6 mo                                 |
| IV  | 4 | 0 | 1 | Site of cyst   | No  | Died after 6 mo                                 |
| IV  | 4 | 0 | 0 | Site of cyst   | No  | Died after 3.5 y later, of metastatic cancer    |

|    |   |   |   |              |    |                 |
|----|---|---|---|--------------|----|-----------------|
| IV | 4 | 0 | 1 | Site of cyst | No | Died after 2 mo |
|----|---|---|---|--------------|----|-----------------|
