# Supplementary material
Source: PubMed Central journal article supplement (PMC7597030)
Supplement: NIHMS1062782-supplement-Sup_4.pdf [file NIHMS1062782-supplement-Sup_4.pdf]

**Supplement Material 4: Fukuoka-Negative Cysts (including those with Pancreas Cyst Surgery and Pancreas Cancer within first 6 months)**

*Risk of FP features According to Cyst Size*

On 5-year follow-up, 87 FN cysts had FP features (<1cm: 17, 1 to <2cm: 38, 2 to <3cm: 32). The risk of FP features for cysts <1 cm, 1 to <2 cm, and 2 to <3 cm was 5.16% (95% CI, 2.29%-7.94%), 11.59% (95% CI, 7.57%-15.43%), and 41.41% (95% CI, 27.43%-52.7%) at 3 years and 8.43% (95% CI, 4.16%-12.51%), 16.93% (95% CI, 11.39%-22.13%), and 44.07% (95% CI, 29.43%-55.68%) at 5 years, respectively. There was significant increase in risk of FP features in between the three groups ( $p<0.0001$ )

*Risk of Undergoing Pancreatic Cyst Surgery According to Cyst Size*

On 5-year follow up, 38 patients underwent pancreas cyst surgery (<1 cm: 7, 1 to <2 cm: 21, and 2 to <3 cm: 10). The risk of undergoing pancreas surgery for cysts <1 cm, 1 to <2 cm, and 2 to <3 cm was 1.57% (95% CI, 0.4%-2.7%), 5.35% (95% CI, 2.90%-7.73%) and 8.8% (95% CI, 2.97%-14.28%) at 3 years and 1.57% (95% CI, 0.4%-2.7%), 7.07 (95% CI, 3.96%-10.07%), and 10.79% (95% CI, 3.79%-17.27%) at 5 years. There was significant increase in risk of pancreatic cyst surgery in between the three groups ( $p<0.0001$ ).

*Risk of PC According to Cyst Size*

On 5-year follow-up, 15 patients with FN cysts developed PC (<1 cm: 6, 1 to <2 cm: 6, and 2 to <3 cm: 3). The risk of PC for cysts <1 cm, 1 to <2 cm, and 2 to <3 cm was 1.46% (95%

CI: 0.18%-2.72%), 1.79% (95% CI, 0.2%-3.36%), and 3.2% (95% CI, 0%-6.52%) at 3 years and 2.33% (95% CI, 0.19%-4.42%), 2.76% (95% CI, 0.27%-5.19%), and 3.2% (95% CI, 0%-6.53%) at 5 years. There was no difference in risk for PC between the three groups ( $p=0.67$ ).
