# Supplementary material
Source: PubMed Central journal article supplement (PMC7597030)
Supplement: NIHMS1062782-supplement-Sup_5.pdf [file NIHMS1062782-supplement-Sup_5.pdf]

## **Supplementary Material 5: Surgery and Pancreatic cancer 6 months after presentation**

### Risk of Undergoing Pancreatic Cyst Surgery or of PC 6 Months After Development of FP Features

The 3- and 5-year risks of undergoing pancreatic cyst surgery for cysts with HR features were 10.48% (95% CI, 0.00%-21.03%) and 10.48% (95% CI, 0.00%-21.03%); for cysts with WFs, the risks were 8.48% (95% CI, 3.91%-12.84%) and 10.68% (95% CI, 5.22%-15.38%) ( $P=.89$ ) (Supplementary Material Figure 1A). The 3- and 5-year risks of PC for cysts with HR features were 17.97% (95% CI, 0.00%-38.67%) and 17.97% (95% CI, 0.00%-38.67%); for cysts with WFs, they were 1.49% (95% CI, 0.00%-3.52%) and 1.49% (95% CI, 0.00%-3.52%) ( $P=.02$ ) (Supplementary Material Figure 1B).

### Comparison Between FP Cysts and FN Cysts 6 Months After Initial Presentation

At 6 months after presentation, the 5-year risk of undergoing pancreatic cyst surgery was greater for FP cysts than FN cysts (HR cysts vs FN cysts, 10.48% [95% CI, 0.00%-21.03%] vs 3.16% [95% CI, 1.70%-4.60%] [ $P=.006$ ]; cysts with WFs vs FN cysts, 10.68% [95% CI, 5.22%-15.38%] vs 3.16% [95% CI, 1.70%-4.60%] [ $P<.001$ ]). Similarly, the 5-year risk of PC was greater for HR cysts than FN cysts (17.97% [95% CI, 0.00%-38.67%] vs 1.65% [95% CI, 0.16%-3.11%];  $P<.001$ ) but not for WF cysts (WF vs FN cysts, 1.49% [95% CI, 0.00%-3.52%] vs 1.65% [95% CI, 0.16%-3.11%],  $P=.40$ ).
